# Supplementary material for: Pomegranate extract induces ellagitannin metabolite formation and changes stool microbiota in healthy volunteers
Source: Royal Society of Chemistry journal article supplement (doi:10.1039/c5fo00669d), 2015-01-01

### Electronic Supplementary Information

**Supplemental Table 1.** Fecal and urine content of ellagic acid and urolithin A, B analyzed by HPLC.

|                   | Baseline   |            |            |                  | Week 4     |            |            |                  |
|-------------------|------------|------------|------------|------------------|------------|------------|------------|------------------|
|                   | Fecal      | Fecal      | Fecal      | Urine            | Fecal      | Fecal      | Fecal      | Urine            |
|                   | EA         | UA         | UB         | UA               | EA         | UA         | UB         | UA               |
|                   | µg/g stool | µg/g stool | µg/g stool | µg/mg creatinine | µg/g stool | µg/g stool | µg/g stool | µg/mg creatinine |
| Non-<br>Producers | 0-6.4      | 0          | 0          | 0-2.9            | 0-174.2    | 0          | 0          | 0-0.6            |
| Producers         | 0-3.7      | 0-71       | 0-36       | 0.1-28           | 0-19       | 14-317     | 0-85       | 2.8-36           |

**Supplemental Table 2.** Fecal content of punicalagin A/B and punicalin analyzed by HPLC.

|                   |            | Baseline   |            | Week 4     |
|-------------------|------------|------------|------------|------------|
|                   | Fecal      | Fecal      | Fecal      | Fecal      |
|                   | Pun A/B    | Punicalin  | Pun A/B    | Punicalin  |
|                   | µg/g stool | µg/g stool | µg/g stool | µg/g stool |
| Non-<br>Producers | 0          | 0          | 0-49       | 0-7.4      |
| Producers         | 0          | 0          | 0-27       | 0-5.7      |

## LC-MS/MS analysis of pomegranate extract

Five milligrams of pomegranate extract was dissolved in 5mL DMSO and further diluted 10 times in DMSO. The LC-MS/MS system consisted of a LCQ Advantage Finnigan instrument with ion-trap mass spectrometer equipped with an electrospray ionization (ESI) interface, and a Surveyor HPLC unit consisting of an autosampler/injector, quaternary pump, column heater, and diode array detector operated by Xcalibur software (Thermo Finnigan Corp). A Zorbax column (SB-C18 5 $\mu$ m 2.1x 150 mm column, Agilent) was used for the separation of analytes using a gradient elution condition by increasing the percentage of acetonitrile (with 1% acetic acid) in water (with 1% acetic acid) from 2% to 25% in 25 minutes at a flow rate of 0.2 mL/min. The MS conditions for the detection of ellagic acid and punicalagin A/B were as follows: ESI in negative mode; scan range 200 to 1200 amu; scan rate 1scan/second; cone voltage 17 eV. The identity of ellagic acid and punicalagin A/B was determined by matching the peak retention time and molecular ions [M-H]<sup>-</sup> obtained by ESI/MS and tandem mass spectrometry (MS-MS) with the expected theoretical molecular weights and the data from literature (Nunez-Sanchez MA et al 2014). The deprotonated [M-H]<sup>-</sup> ions were m/z 301 and 1083, and the fragment ions were m/z 257, 229 and 781, 601 for ellagic acid and punicalagin A/B, respectively.

Nunez-Sanchez, M. A., Garcia-Villalba, R., Monedero-Saiz, T., Garcia-Talavera, N. V., Gomez-Sanchez, M. B., Sanchez-Alvarez, C., Garcia-Albert, A. M., Rodriguez-Gil, F. J., Ruiz-Marin, M. et al. (2014) Targeted metabolic profiling of pomegranate polyphenols and urolithins in plasma, urine and colon tissues from colorectal cancer patients. *Mol. Nutr. Food Res.* 58: 1199-1211.

**Figure 1.** LC-MS/MS analysis of standards (A) and pomegranate supplement (B).

**A. Standards**

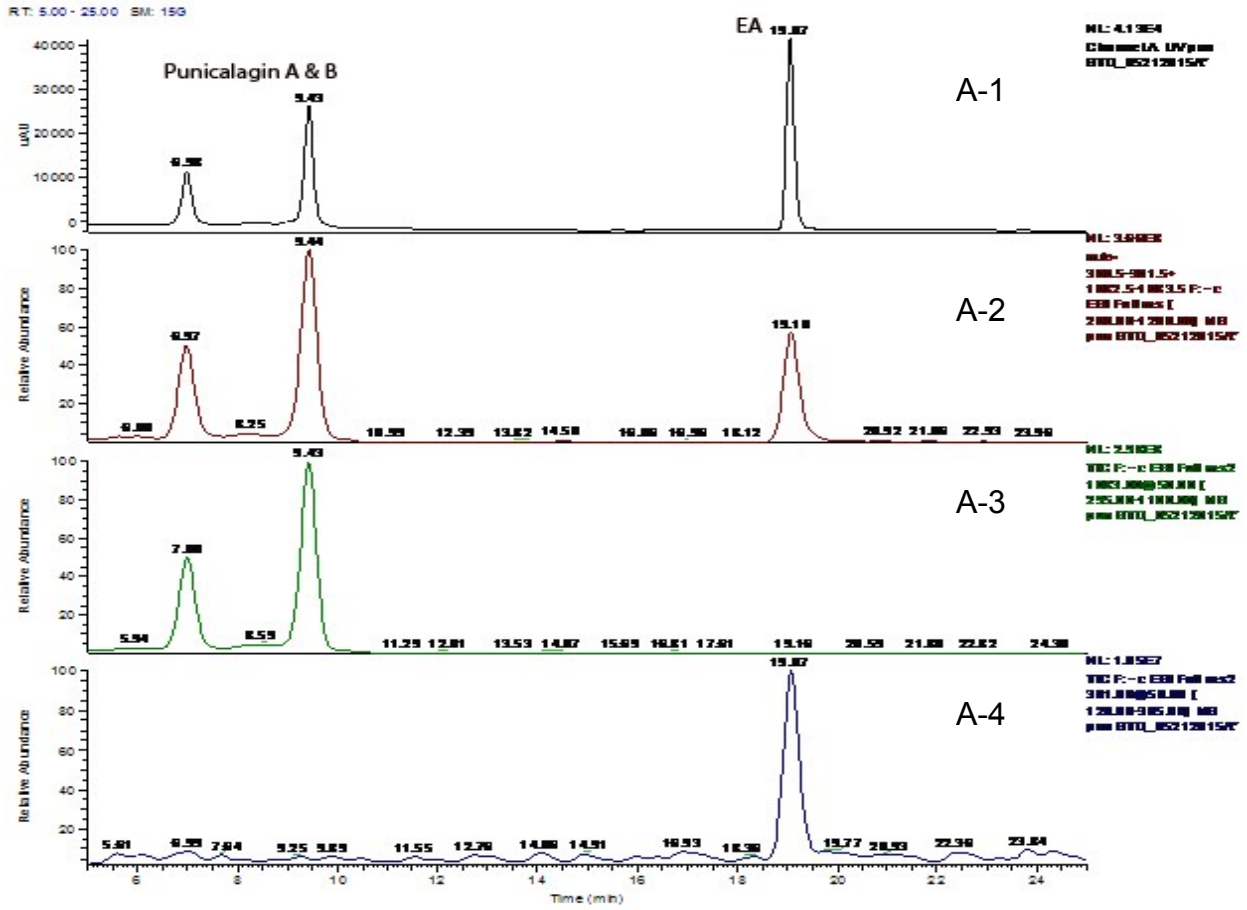

Punicalagin AB and EA standards: 1) UV @ 360 nm 2) Full Scan 200-1200 @ M-H  
 M/Z=1083 & M/Z=301 3) MS/MS of 1083 4) MS/MS of 301

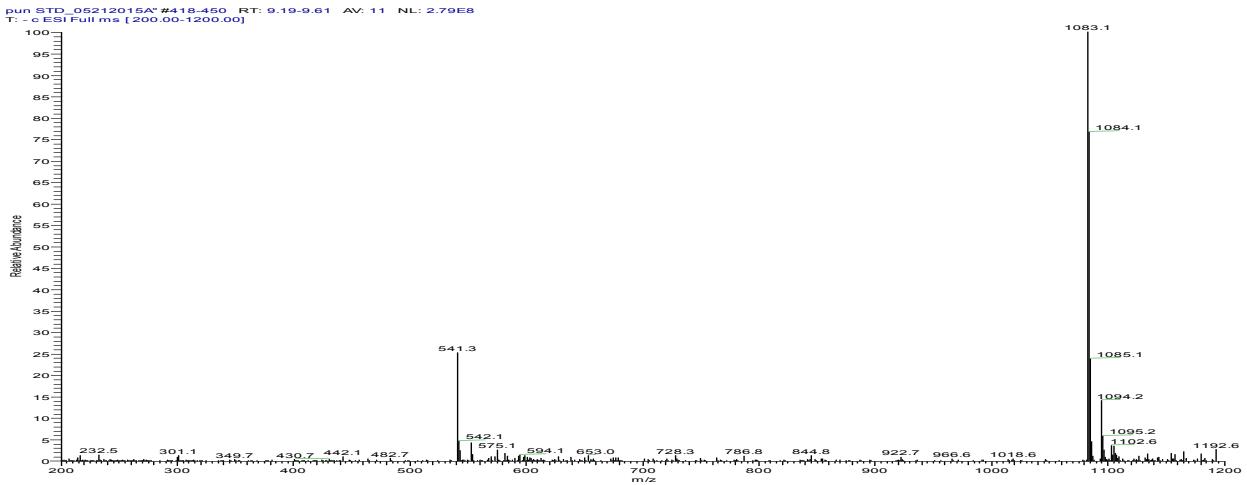

Spectrum of M/Z=1083

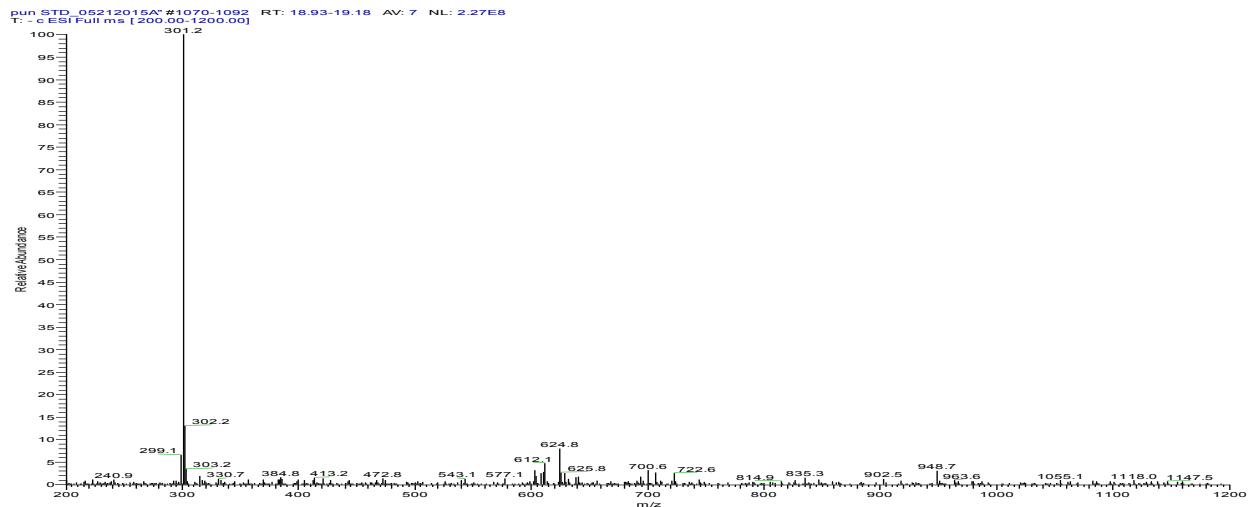

Spectrum of M/Z=301

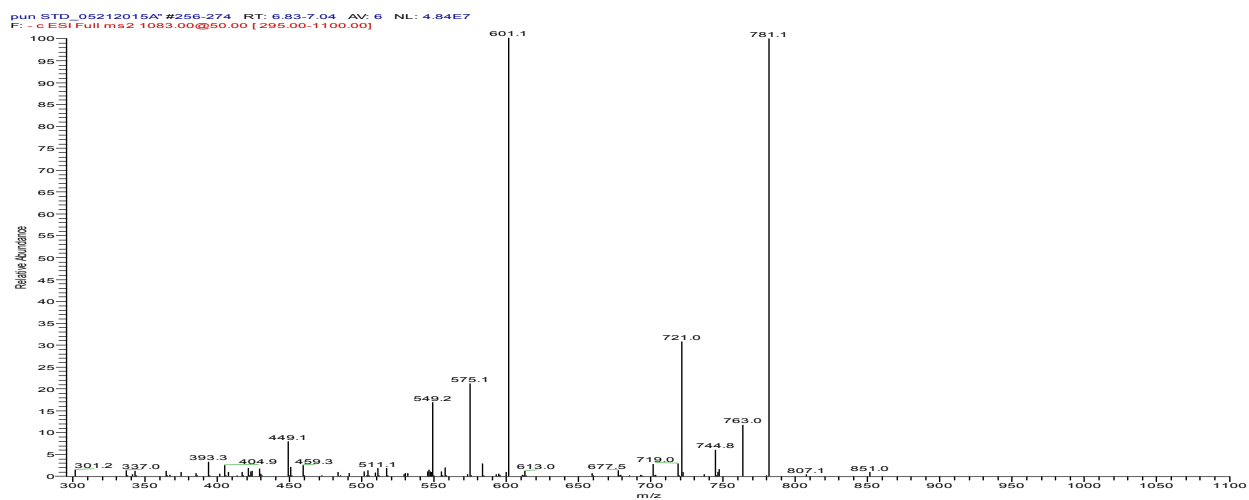

Spectrum of 1083 MS/MS

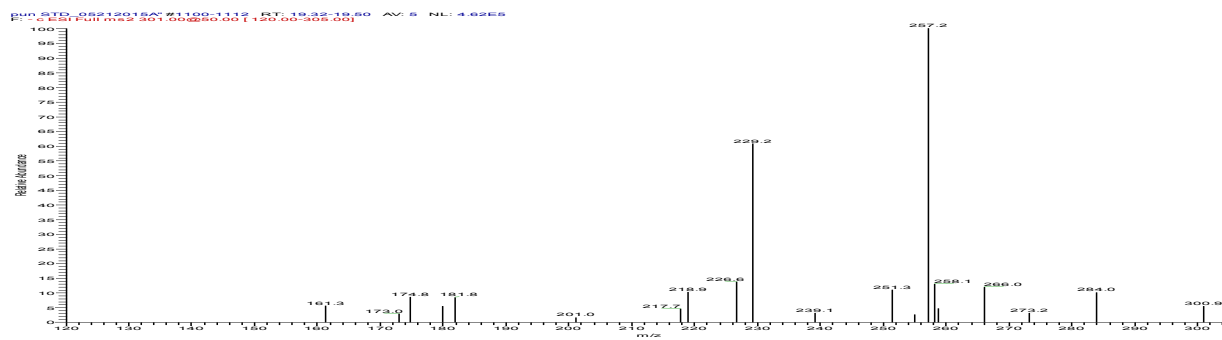

Spectrum of 301 MS/MS

## B. Pomegranate extract

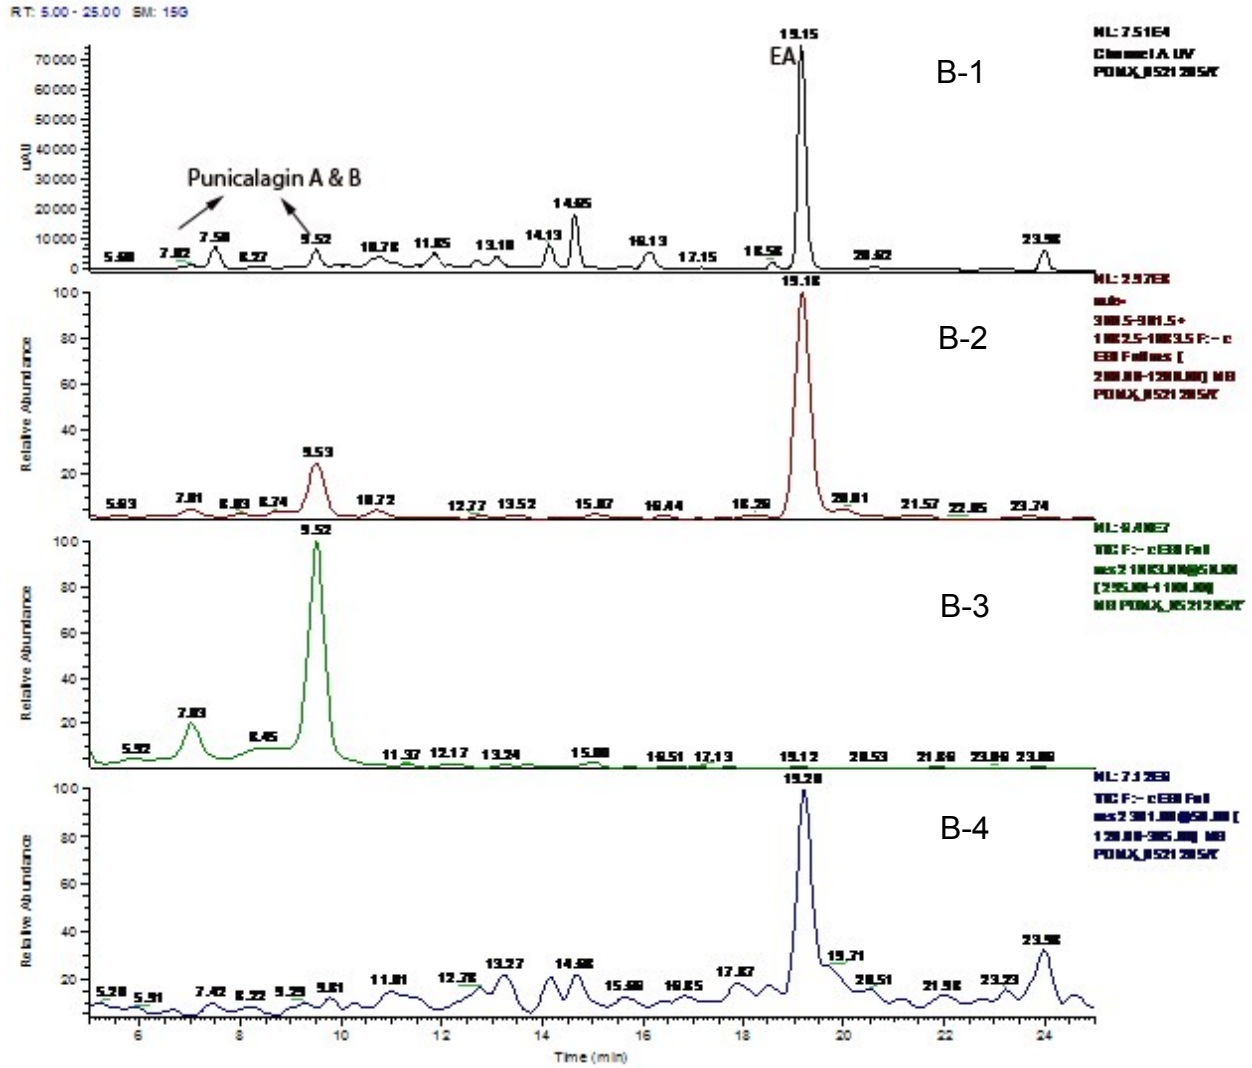

- 1) UV @ 360 nm
- 2) Full Scan 200-1200 @ M-H M/Z=1083 & M/Z=301
- 3) MS/MS of 1083
- 4) MS/MS of 301

POMX\_0521205A#434.451 RT: 9.45-9.66 AV: 6 NL: 8.98E7  
T: - c ESI Full ms [200.00-1200.00]

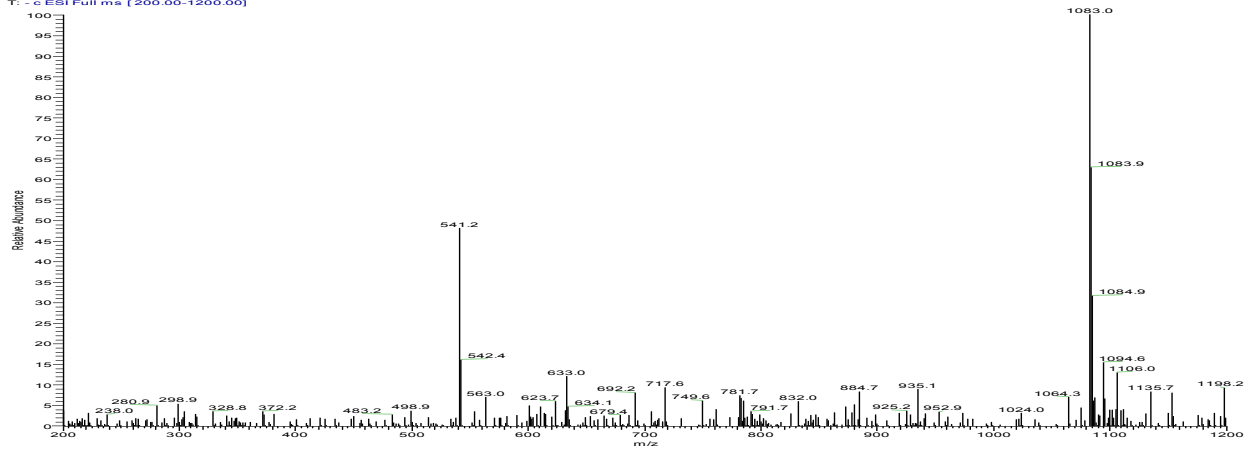

Spectrum of M/Z=1083

POMX\_0521205A#1083-1111 RT: 19.01-19.39 AV: 10 NL: 2.46E8  
T: - c ESI Full ms [200.00-1200.00]

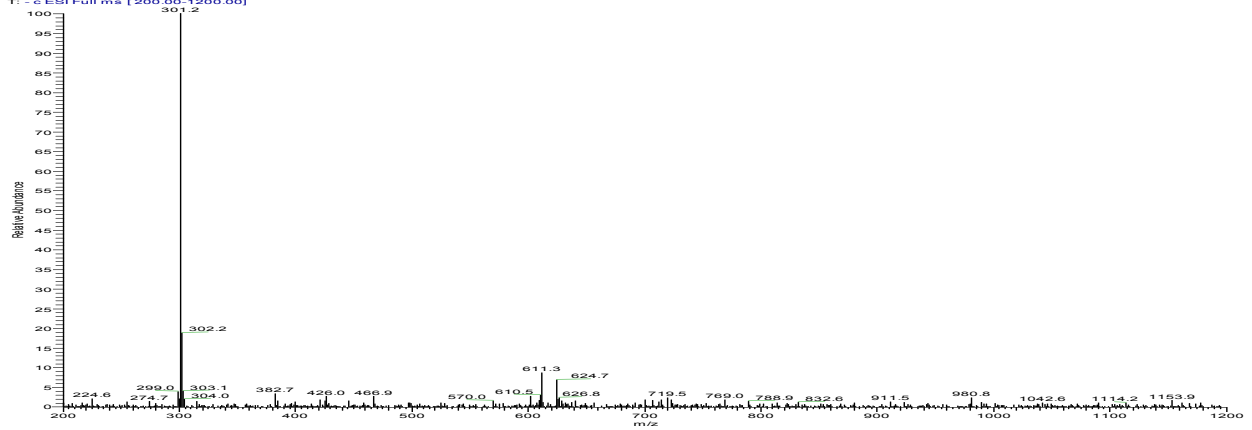

Spectrum of M/Z=301

POMX\_0521205A#423.449 RT: 9.25-9.60 AV: 9 NL: 1.77E7  
F: - c ESI Full ms x2 1083.00@50.00 [295.00-1100.00]

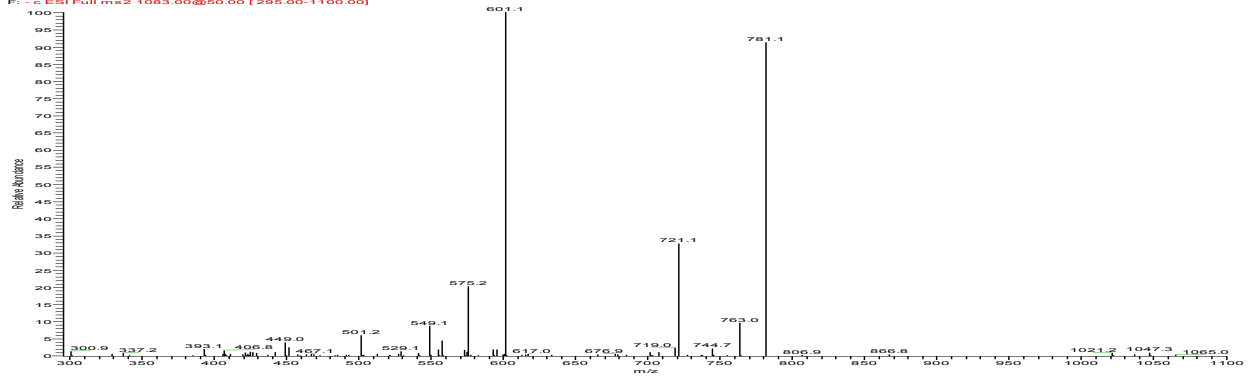

Spectrum of 1083 MS/MS

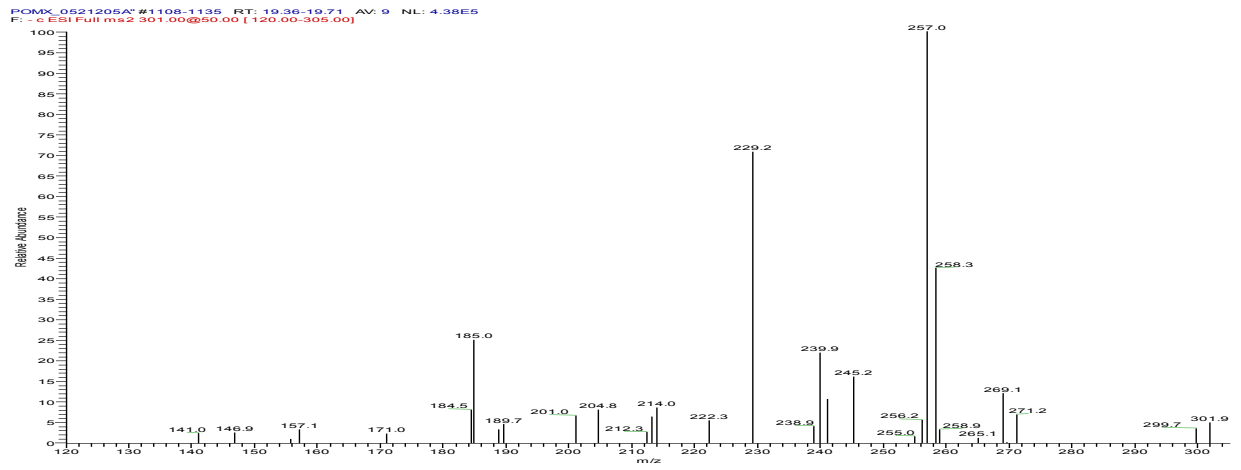

Spectrum of 301 MS/MS

**Figure 2.** HPLC Chromatograms of standards (A): ellagic acid (EA), urolithin A (UA) and urolithin B (UB) and fecal samples (B-G) representing the different groups of UA formation.

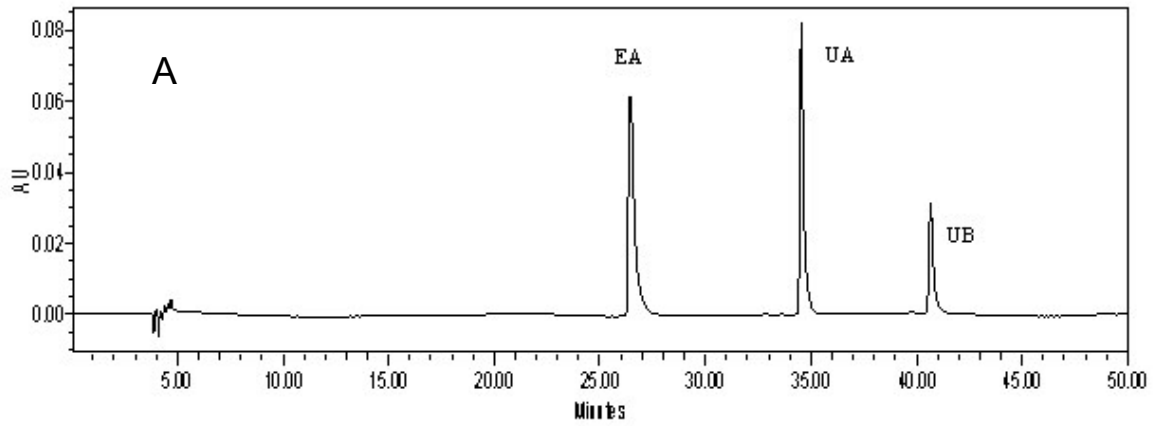

**Example for Group 1:** individuals with no baseline fecal UA presence (B) but induction of fecal UA formation by POM extract consumption after 28 days (C).  
Baseline

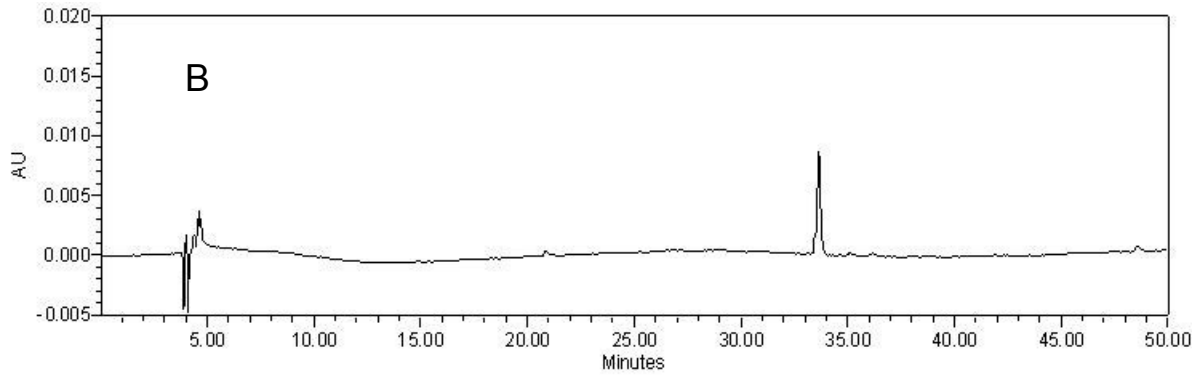

Day 28

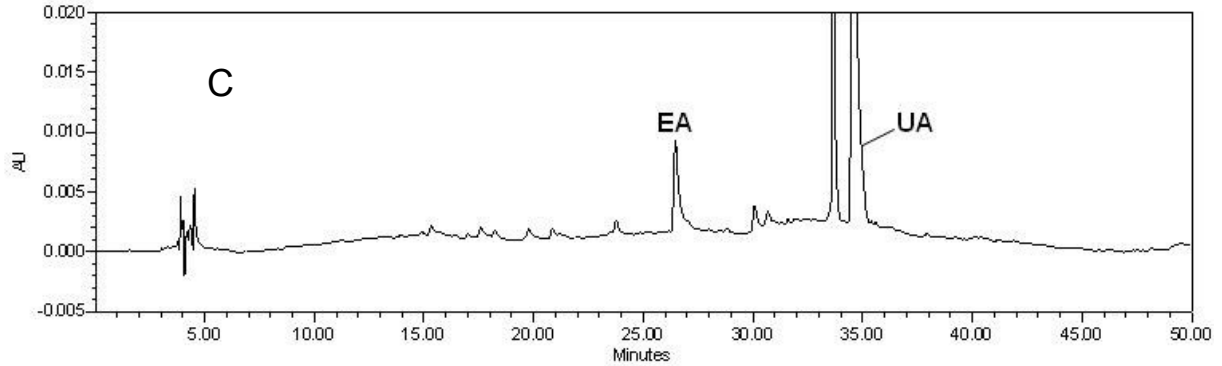

**Example for Group 2:** baseline fecal UA formation (D) which was enhanced by POM extract consumption (E).  
Baseline

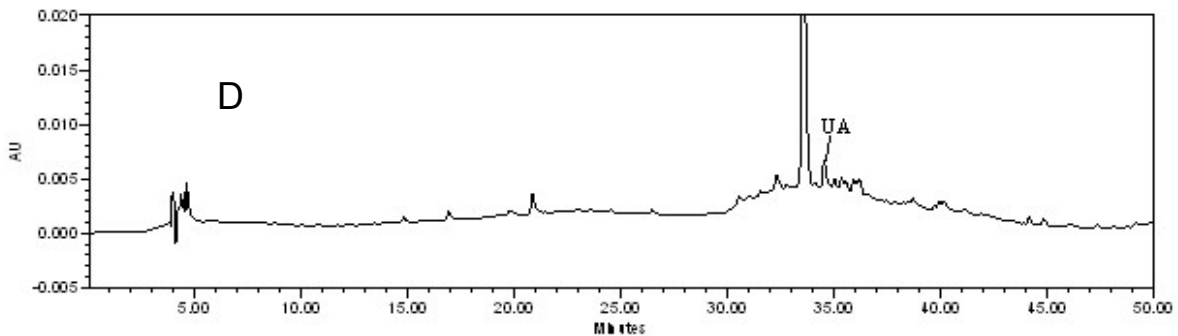



Day 28

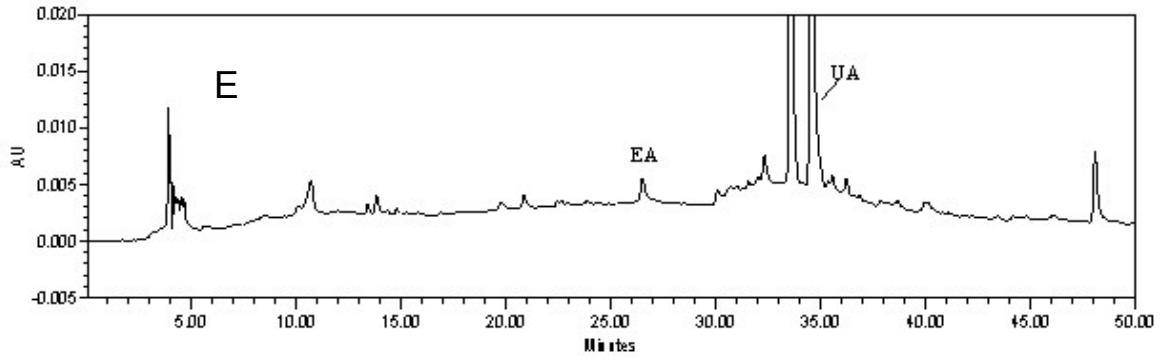

**Example for Group 3:** no baseline fecal UA production (F), which was not inducible (G).

Baseline

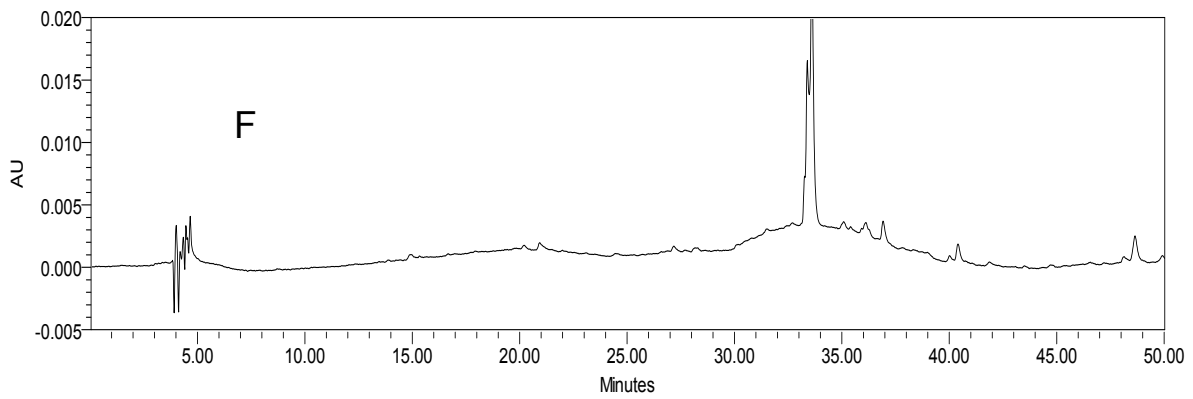

Day 28

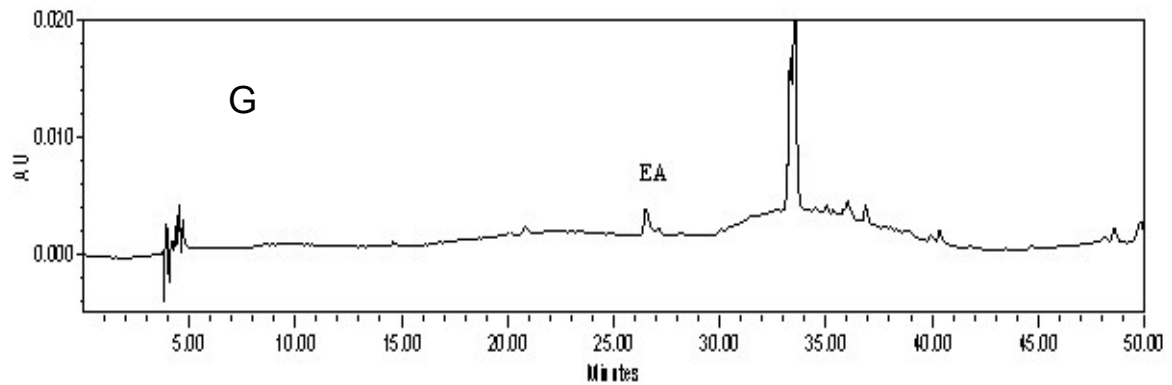

Supplement: c5fo00669d1.pdf [file c5fo00669d1.pdf]
